# Supplementary material for: Transcriptional response of Medicago truncatula sulphate transporters to arbuscular mycorrhizal symbiosis with and without sulphur stress
Source: Springer Nature journal article supplement (doi:10.1007/s00425-012-1645-7), 2012-04-25
Supplement: MOESM4 [file 425_2012_1645_MOESM4_ESM.doc]

**Supplementary Table.S4:** qPCR Primers used in the experiments.

| **Gene ID** | **proposed ID** |  | **Primer sequences** | **Amplicon** |
| --- | --- | --- | --- | --- |
| Medtr2g008470 | MtSULTR1.1 | F | CCCGGGACCAATTGTAATC | 99bp |
| R | GTTGCAACAGCATCACCTAC |
| MedtrCU651589_3.1 | MtSULTR1.2 | F | TCCTGGTTCAGCAGTGAC | 184bp |
| R | GCCACTGTCCATTTCATC |
| Medtr5g061880 | MtSULTR1.3 | F | CTGTTCTCCAAAGCTAGCTG | 149bp |
| R | CATAGCTAACCCAGCTGA |
| Medtr5g061860 | MtSULTR2.1 | F | AAGAGGTTGCTTTCACGC | 137bp |
| R | TCTACAGCCTCTCCAACAG |
| Medtr3g087740 | MtSULTR2.2 | F | GTGGCAGAGTGTATCTCA | 103bp |
| R | GCTAGTAGCCATATCCATCC |
| Medtr1g071530 | MtSULTR3.1 | F | CTGACAGTGGAAGATGCT | 91bp |
| R | CTCAGACATTGTTCCAACCC |
| Medtr6g086170 | MtSULTR3.2 | F | CATTGGTAAACCCTAGGTTGG | 157bp |
| R | GTGTCTTCATTATTGTTTGGC |
| Medtr7g022870 | MtSULTR4.1 | F | ACGGGACATTCAGATTGC | 122bp |
| R | GAACAGCATCGTGTACTCTC |
